# Supplementary material
Source: PubMed Central journal article supplement (PMC6724181)
Supplement: jama-322-834-s002.pdf [file jama-322-834-s002.pdf]

## **Data Sharing Statement**

### **Data**

**Data available:** Yes

**Data types:** Deidentified participant data, Data dictionary

**How to access data:** <https://biolincc.nhlbi.nih.gov>

**When available:** With publication

### **Supporting Documents**

**Document types:** None

### **Additional Information**

**Who can access the data:** Researchers whose use of the data has been approved by the NHLBI

**Types of analyses:** For any non-commercial purposes

**Mechanisms of data availability:** Per NHLBI policies
